# Supplementary material for: Intra-Domain Cysteines (IDC), a New Strategy for the Development of Original Antibody Fragment–Drug Conjugates (FDCs)
Source: MDPI journal article supplement (doi:10.3390/pharmaceutics14081524), 2022-07-22
Supplement: s1 [file s1]

# SUPPORTING INFORMATION

## **Intra-domain cysteines (IDC), a new strategy for the development of original antibody fragment-drug conjugates (FDC).**

**Louis Jolivet,<sup>1,a</sup> Imène Ait Mohamed Amar,<sup>2,a</sup> Catherine Horiot,<sup>1</sup> Fanny Boursin,<sup>1</sup> Cyril Colas,<sup>4,5</sup> Stéphanie Letast,<sup>2</sup> Caroline Denevault-Sabourin,<sup>2</sup> Emilie Allard-Vannier,<sup>3</sup> Nicolas Joubert,<sup>2,\*</sup> and Nicolas Aubrey<sup>1</sup>**

<sup>1</sup> ISP UMR 1282, INRA, Université de Tours, Team BioMAP, 31 avenue Monge, 37200 Tours, France;

<sup>2</sup> GICC EA7501, Team IMT, Université de Tours, UFR de médecine, Bâtiment Vialle, 10 Boulevard Tonnelé, BP 3223, 37032 Tours cedex 01, France;

<sup>3</sup> NMNS EA 6295, Université de Tours, 31 avenue Monge, 37200 Tours, France;

<sup>4</sup> ICOA UMR 7311, Université d'Orléans, CNRS, rue de Chartres, 45067 Orléans, France;

<sup>5</sup> CBM UPR 4301, CNRS, Université d'Orléans, rue Charles Sadron, 45071 Orléans, France.

<sup>a</sup> These authors contributed equally to this work.

\* Correspondence: nicolas.joubert@univ-tours.fr

## TABLE OF CONTENT

|                                                                                          |    |
|------------------------------------------------------------------------------------------|----|
| Mass spectrometry analysis of native and conjugated scFv.....                            | S2 |
| Relative percentage of monomer and dimer in each native scFv.....                        | S4 |
| Equilibrium dissociation constant $K_D$ measurement for native and conjugated scFv ..... | S5 |
| Cell viability study for native scFv.....                                                | S5 |
| Statistical analysis for cytotoxic data.....                                             | S5 |

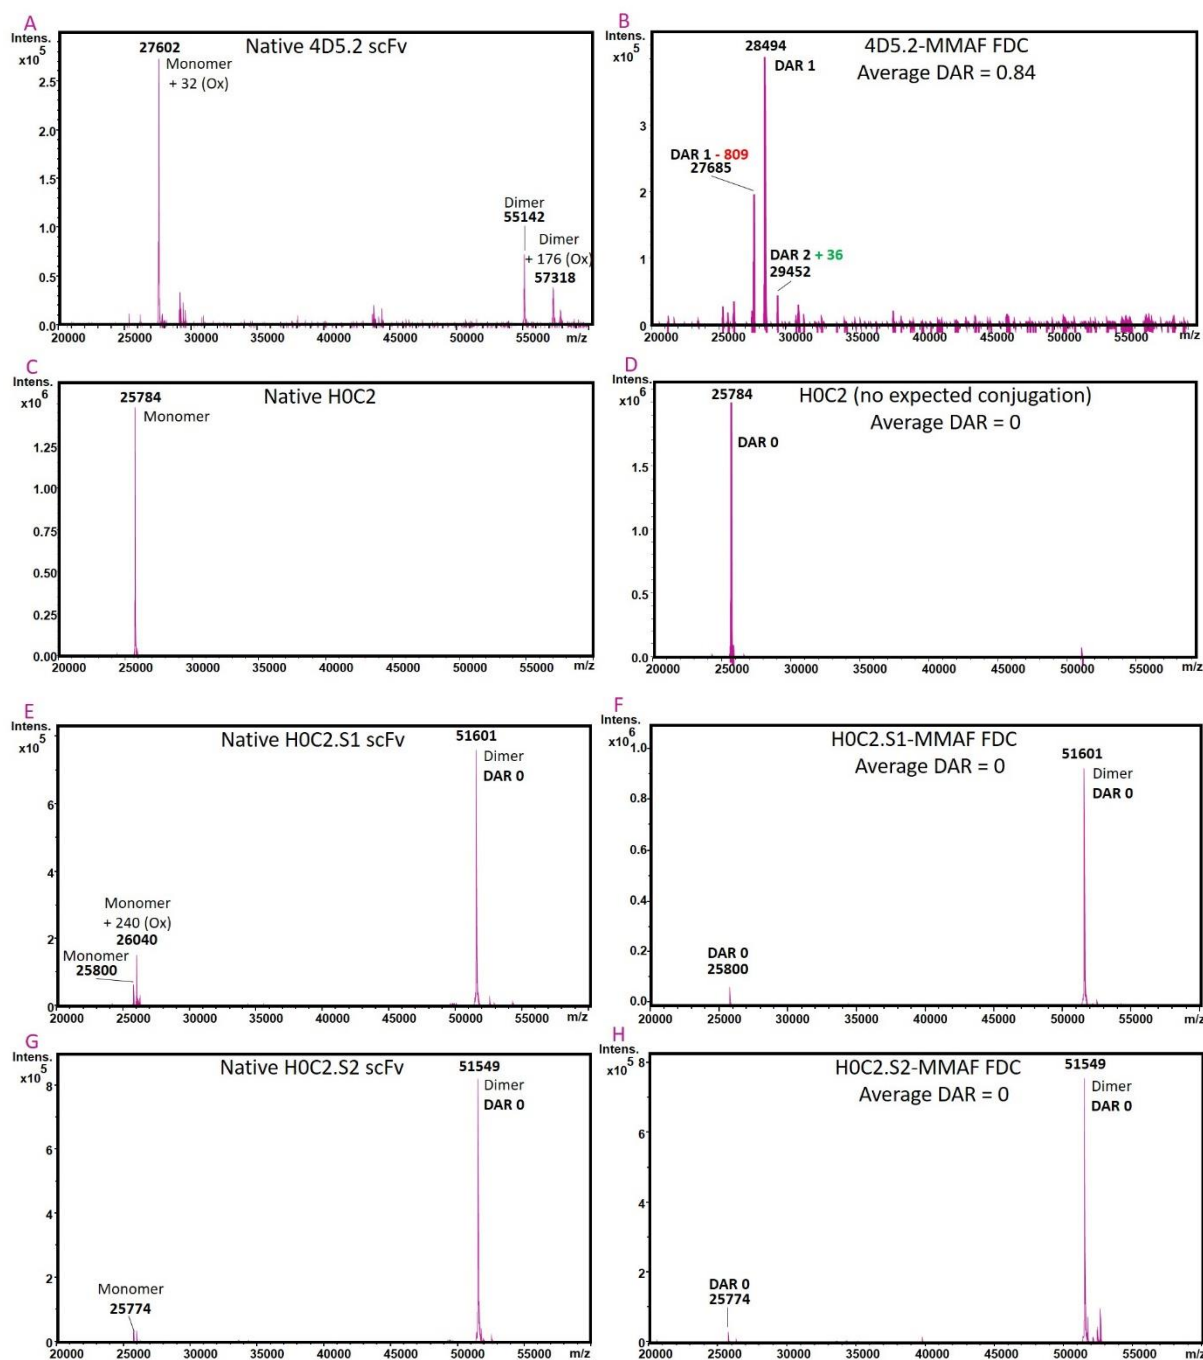

**Figure S1.** Deconvoluted mass spectra of (A) native scFv 4D5.2, observed as oxidized monomer (MW +32 Da), dimer (MW x2) and oxidized dimer (MW x2 +176 Da). Oxidized species (and dimers when possible) are expected to disappear after mild reduction. (B) FDC 4D5.2-MMAF presenting (i) a +923 Da mass increment (expected +923 Da) corresponding to a DAR 1 monomer with the conjugation of one linker-MMAF 1, (ii) a second species (degraded DAR 1, DAR 1 - 809 Da) resulting from the deconjugation (loss) of an aminocaproic-MMAF from a DAR 1 and transformation of maleimide into maleic anhydride, and (iii) a third species with a +1846 Da mass increment, corresponding to the conjugation of two linker-MMAF 1, with both stabilized (opened/hydrolyzed) maleimide (+18 Da x2), leading to a stabilized DAR 2 monomer (MW +1846 Da + 36 Da). (C) native reference scFv H0C2, on which no conjugation is expected. (D) unconjugated H0C2. (E) native scFv H0C2.S1, observed as monomer (MW), oxidized monomer (MW +240 Da) and dimer (MW x2). (F) FDC H0C2.S1-MMAF, observed as DAR 0 monomer (MW) and DAR 0 dimer (MW x2). (G) native scFv H0C2.S2, observed as monomer (MW) and dimer (MW x2). (H) FDC H0C2.S2-MMAF, observed as DAR 0 monomer (MW) and DAR 0 dimer (MW x2).

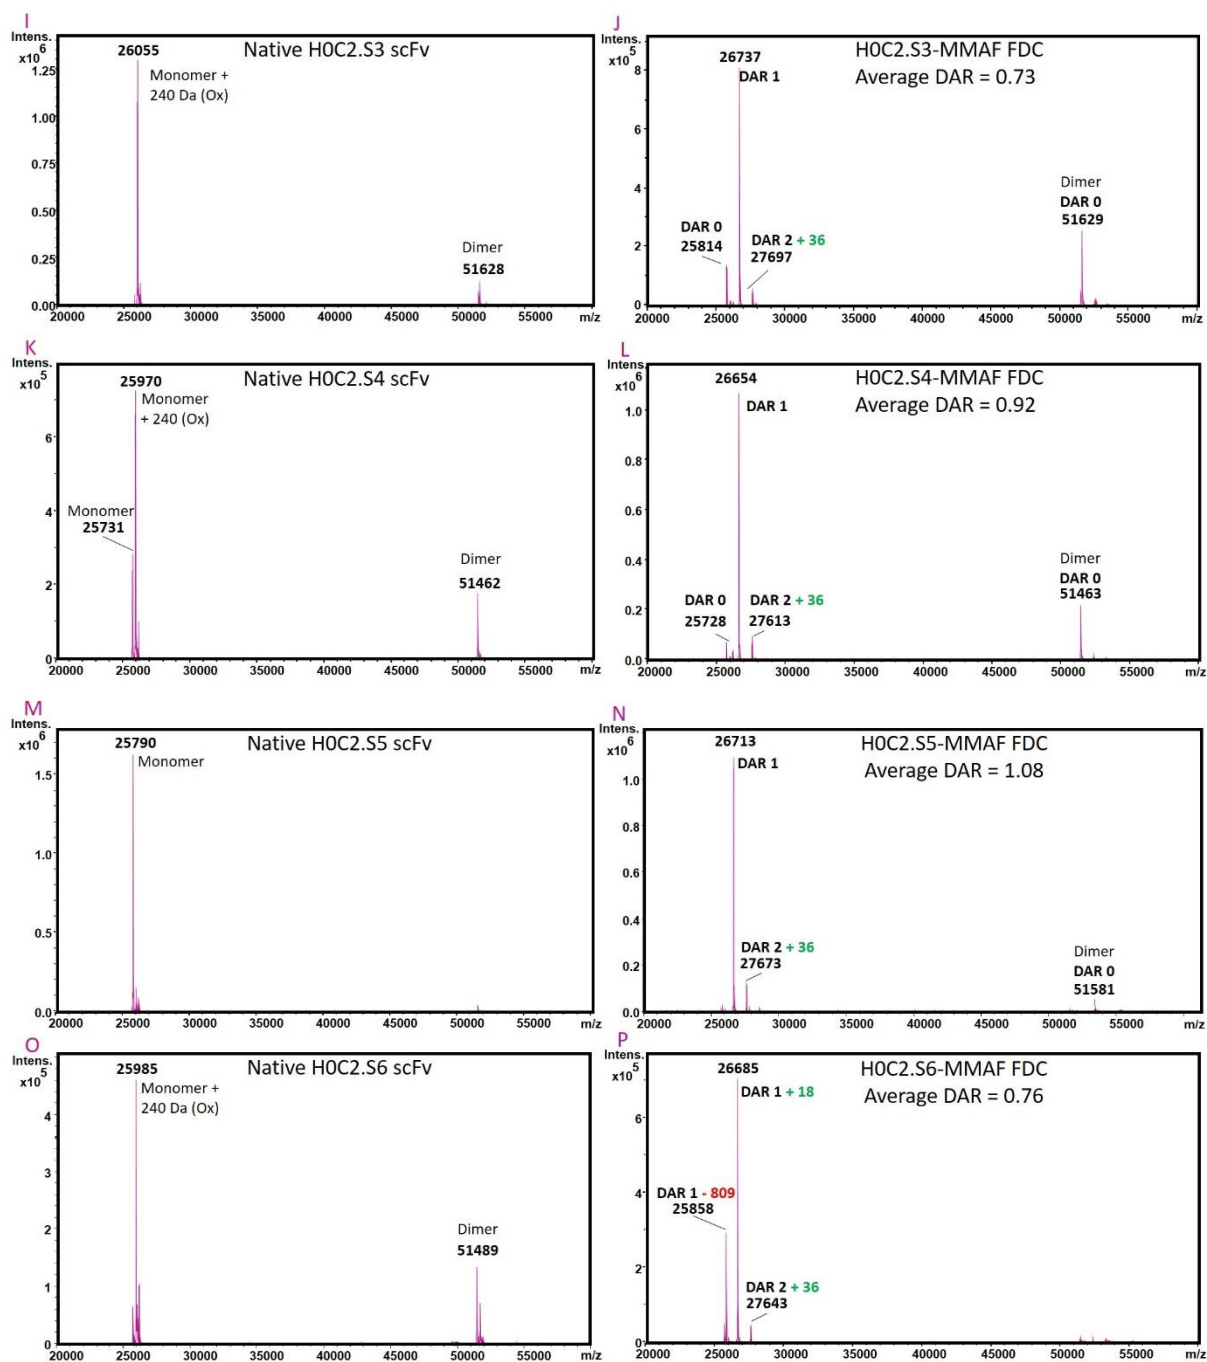

**Figure S1 (continued).** Deconvoluted mass spectra of (I) native H0C2.S3, observed as oxidized monomer (MW +240 Da) and dimer (MW x2) (J) FDC H0C2.S3-MMAF as four species: DAR 0 monomer (MW), DAR 1 monomer (MW +923 Da), stabilized DAR 2 monomer (MW +1846 Da +36 Da) and DAR 0 dimer (MW x2). (K) native scFv H0C2.S4, observed as monomer (MW), oxidized monomer (MW +240 Da) and dimer (MW x2). (L) FDC H0C2.S4-MMAF as four species: DAR 0 monomer (MW), DAR 1 monomer (MW +923 Da), stabilized DAR 2 monomer (MW +1846 Da +36 Da) and DAR 0 dimer (MW x2). (M) native scFv H0C2.S5 as a monomer (N) FDC H0C2.S5-MMAF as three species: DAR 1 monomer (MW +923 Da), stabilized DAR 2 monomer (MW +1846 Da +36 Da) and DAR 0 dimer (MW x2). (O) native scFv H0C2.S6, as oxidized monomer (MW +240 Da) and dimer (MW x2). (P) FDC H0C2.S6-MMAF as three species: degraded DAR 1 monomer (MW +923 Da -809 Da), stabilized DAR 1 monomer (MW +923 Da +18 Da), and stabilized DAR 2 monomer (MW +1846 Da +36 Da).

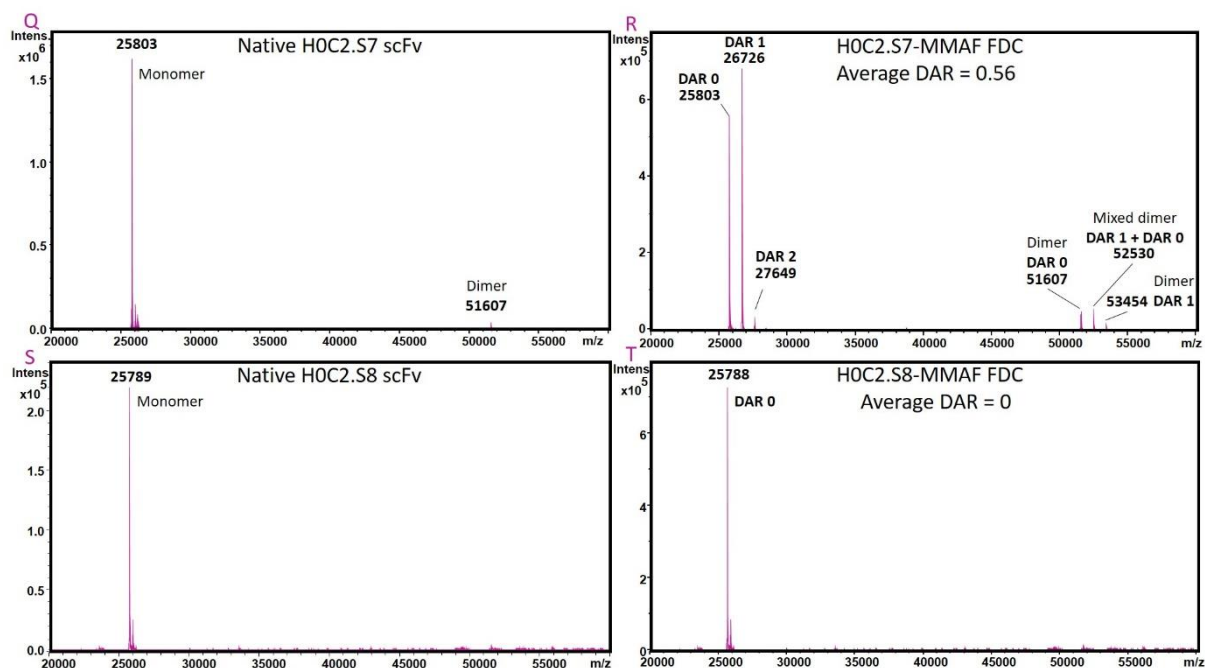

**Figure S1 (continued).** Deconvoluted mass spectra of (Q) native H0C2.S7, observed as monomer (MW) and dimer (MW x2) (R) FDC H0C2.S7-MMAF as six species: DAR 0 monomer (MW), DAR 1 monomer (MW +923 Da), DAR 2 monomer (MW +1846 Da +36 Da), DAR 0 dimer (MW x2), mixed DAR 0 and DAR 1 dimer (MW x2 +923 Da) and DAR 1 dimer (MW x2 +1846 Da). (S) native scFv H0C2.S8 as monomer (MW). (T) FDC H0C2.S8-MMAF as DAR 0 monomer (MW).

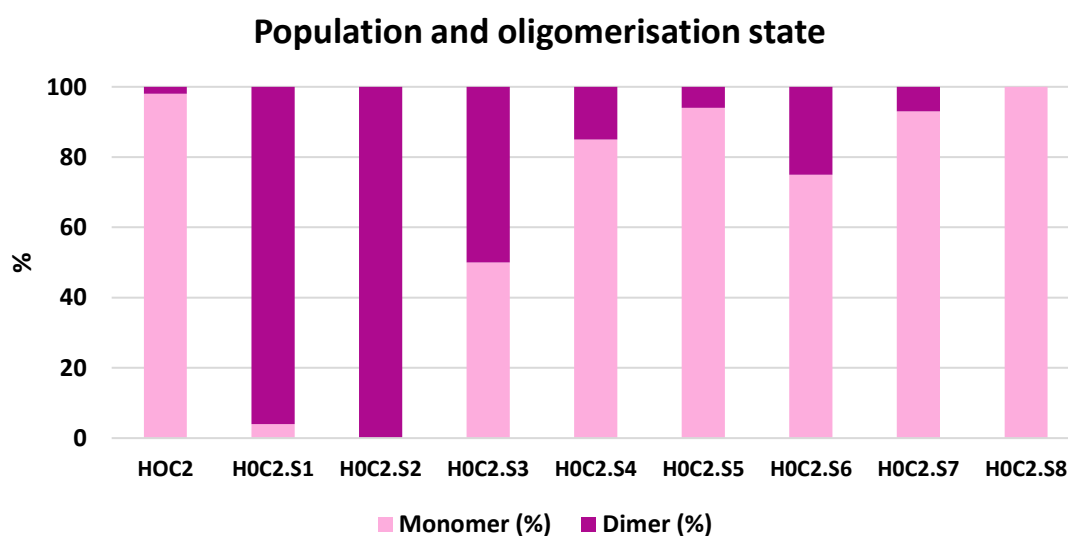

**Figure S2.** Relative percentage of monomer and dimer in each native scFv.

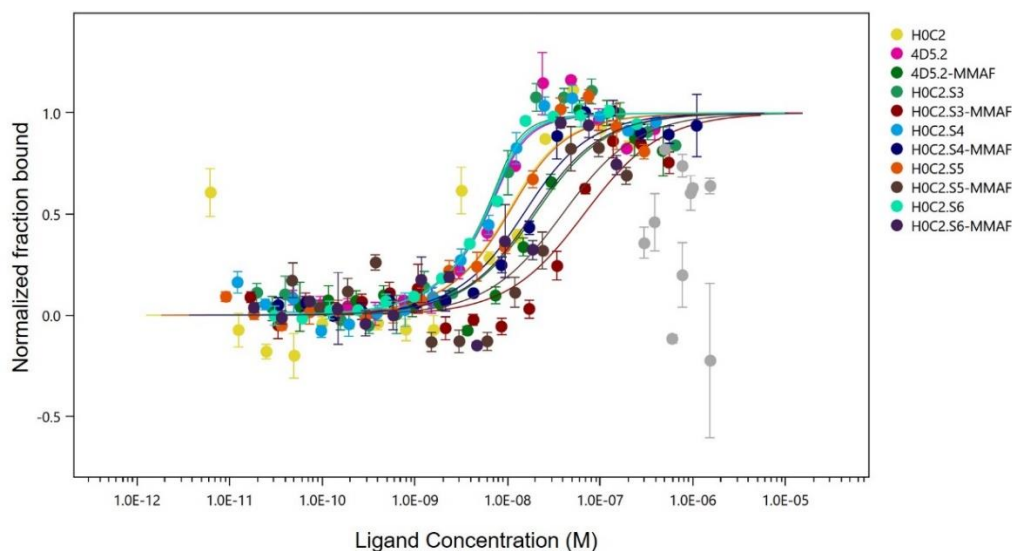

**Figure S3.** Overview of the equilibrium dissociation constant  $K_D$  measurements for the native fragments H0C2, 4D5.2 and H0C2.Sx ( $x = 3$  to 6) or the conjugated fragments 4D5.2-MMAF and H0C2.Sx-MMAF ( $x = 3$  to 6) towards their specific antigen HER2.

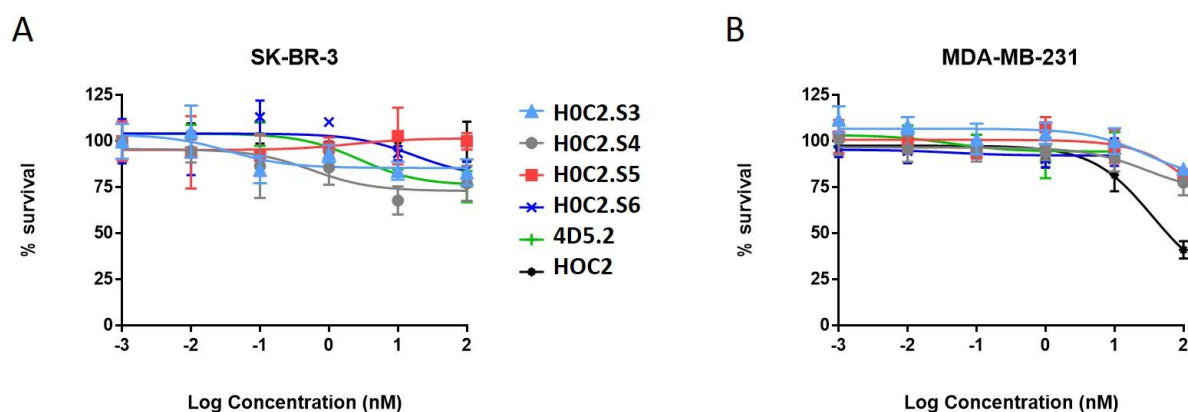

**Figure S4.** Cytotoxicity data for scFv 4D5.2, H0C2 and H0C2.Sx ( $x = 3$  to 6) (A) on the HER2 overexpressing cell line SK-BR-3 and (B) on the HER2 low expressing cell line MDA-MB-231.

|                                                      | $EC_{50}$<br>(nM)   | <i>P</i> value | T-score | df | Standard error<br>of difference | Significance    |
|------------------------------------------------------|---------------------|----------------|---------|----|---------------------------------|-----------------|
| <b>4D5.2-MMAF</b><br>( $EC_{50} = 0.261 \pm 0.057$ ) | <b>H0C2.S3-MMAF</b> |                |         |    |                                 |                 |
|                                                      | $0.301 \pm 0.200$   | 0.6478         | 0.4709  | 10 | 0.085                           | Not significant |
|                                                      | <b>H0C2.S4-MMAF</b> |                |         |    |                                 |                 |
|                                                      | $0.031 \pm 0.005$   | 0.0001         | 9.7780  | 10 | 0.024                           | Significant     |
|                                                      | <b>H0C2.S5-MMAF</b> |                |         |    |                                 |                 |
|                                                      | $0.775 \pm 0.264$   | 0.0009         | 4.6619  | 10 | 0.110                           | Significant     |
|                                                      | <b>H0C2.S6-MMAF</b> |                |         |    |                                 |                 |
|                                                      | $0.070 \pm 0.011$   | 0.0001         | 8.0127  | 10 | 0.024                           | Significant     |

**P:** the probability of success, **t:** the ratio of the departure of the estimated value of a parameter from its hypothesized value to its standard error, **df:** degree of freedom,

**Figure S5.** Statistical significance for cytotoxicity data (on the HER2 overexpressing cell line SK-BR-3) of conjugates H0C2.Sx-MMAF ( $x = 3$  to 6) in comparison to reference 4D5.2-MMAF.
